# Supplementary material for: Development of magnetic molecularly imprinted polymers with double templates for the rapid and selective determination of carbamazepine and lamotrigine in serum
Source: Royal Society of Chemistry journal article supplement (doi:10.1039/d1ra09306a), 2022-01-01
Supplement: d1ra09306a1.pdf [file d1ra09306a1.pdf]

### Supporting Information

#### **Development of magnetic molecularly imprinted polymers with double templates for the rapid and selective determination of carbamazepine and lamotrigine in serum**

Ya-qin Wei<sup>a, #</sup>, Lin-lin Zhao<sup>a, #</sup>, Yu-xin You<sup>a, #</sup>, Yan-lin Zhao<sup>b</sup>, Xiao-xiao Zheng<sup>c</sup>, Yan Du<sup>a</sup>, Dao-quan Tang<sup>a, d, \*</sup>

<sup>a</sup>Jiangsu Key Laboratory of New Drug Research and Clinical Pharmacy, Xuzhou Medical University, Xuzhou 221004, China

<sup>b</sup>Department of Pharmacy, Suining People's Hospital Affiliated to Xuzhou Medical University, Suining 221202, China

<sup>c</sup>Department of Pharmacy, Xuzhou Municipal Hospital Affiliated to Xuzhou Medical University, Xuzhou 221002, China

<sup>d</sup>Department of Pharmaceutical Analysis, Xuzhou Medical University, Xuzhou 221204, China

<sup>#</sup>These authors contributed to the work equally and should be regarded as co-first authors.

\*Correspondence: Professor Dao-quan Tang, Department of Pharmaceutical Analysis, Xuzhou Medical University, 209 Tongshan Road, Xuzhou City, Jiangsu Province, P.R. China.

Tel & Fax: +86 516 83263133

*E-mail address:* [tdq993@hotmail.com](mailto:tdq993@hotmail.com) or [tangdq@xzhmu.edu.cn](mailto:tangdq@xzhmu.edu.cn) (D.Q. Tang)

Table S1 Linearity, ranges and lower limit of quantification (LLOQ) of LTG and CBZ in rat serum treated by dispersive Dt-MMIPs SPE and acetonitrile protein precipitation (n=5)

| Analyte | Dt-MMIPs            |        | Acetonitrile protein precipitation |        | Ranges<br>( $\mu\text{g/mL}$ ) | LLOQ<br>( $\mu\text{g/mL}$ ) |
|---------|---------------------|--------|------------------------------------|--------|--------------------------------|------------------------------|
|         | Regression equation | $R^2$  | Regression equation                | $R^2$  |                                |                              |
| LTG     | $y=11670x+26686$    | 0.9998 | $y=8757.7x-548.13$                 | 0.9999 | 1.25~50                        | 1.25                         |
| CBZ     | $y=24774x+29200$    | 0.9992 | $y=15290x+2073.5$                  | 0.9996 | 1.25~50                        | 1.25                         |

Table S2 Intra-batch accuracy and precision of LTG and CBZ in rat serum treated by dispersive Dt-MMIPs SPE and acetonitrile protein precipitation (Mean $\pm$ SD, n=5)

| Analyte | Nominal concentration<br>( $\mu\text{g/mL}$ ) | Dt-MMIPs                      |                  |            | Acetonitrile protein precipitation |                   |            |
|---------|-----------------------------------------------|-------------------------------|------------------|------------|------------------------------------|-------------------|------------|
|         |                                               | Found<br>( $\mu\text{g/mL}$ ) | Accuracy<br>(%)  | RSD<br>(%) | Found<br>( $\mu\text{g/mL}$ )      | Accuracy<br>(%)   | RSD<br>(%) |
| LTG     | 3                                             | 3.07                          | 102.3 $\pm$ 0.13 | 4.1        | 3.09                               | 103.1 $\pm$ 0.05  | 1.6        |
|         | 25                                            | 24.80                         | 99.2 $\pm$ 0.70  | 2.8        | 25.04                              | 100.2 $\pm$ 0.65  | 2.6        |
|         | 37.5                                          | 37.86                         | 101.0 $\pm$ 0.53 | 1.4        | 37.36                              | 99.6 $\pm$ 0.64   | 1.7        |
| CBZ     | 3                                             | 2.65                          | 88.3 $\pm$ 0.27  | 10.3       | 2.88                               | 96.0 $\pm$ 0.04** | 1.4        |
|         | 25                                            | 25.26                         | 101.0 $\pm$ 0.15 | 0.6        | 25.17                              | 100.7 $\pm$ 0.79  | 3.1        |
|         | 37.5                                          | 38.21                         | 101.9 $\pm$ 0.11 | 0.3        | 37.59                              | 100.2 $\pm$ 0.59  | 1.6        |

\*\* $P<0.01$  vs Dt-MMIPs

Table S3 Inter-batch accuracy and precision of LTG and CBZ in rat serum treated by dispersive Dt-MMIPs SPE and acetonitrile protein precipitation (Mean $\pm$ SD, n=15)

| Analyte | Nominal concentration<br>( $\mu\text{g/mL}$ ) | Dt-MMIPs                      |                  |            | Acetonitrile protein precipitation |                   |            |
|---------|-----------------------------------------------|-------------------------------|------------------|------------|------------------------------------|-------------------|------------|
|         |                                               | Found<br>( $\mu\text{g/mL}$ ) | Accuracy<br>(%)  | RSD<br>(%) | Found<br>( $\mu\text{g/mL}$ )      | Accuracy<br>(%)   | RSD<br>(%) |
| LTG     | 3                                             | 3.05                          | 101.8 $\pm$ 0.16 | 5.1        | 3.09                               | 103.2 $\pm$ 0.09  | 3.0        |
|         | 25                                            | 24.92                         | 99.7 $\pm$ 0.79  | 3.2        | 24.87                              | 99.50 $\pm$ 0.51  | 2.1        |
|         | 37.5                                          | 38.08                         | 101.6 $\pm$ 0.49 | 1.3        | 37.88                              | 101.0 $\pm$ 1.08  | 2.9        |
| CBZ     | 3                                             | 2.63                          | 87.9 $\pm$ 0.24  | 9.1        | 2.83                               | 94.30 $\pm$ 0.05* | 1.9        |
|         | 25                                            | 25.34                         | 101.4 $\pm$ 0.29 | 1.1        | 25.22                              | 100.9 $\pm$ 0.72  | 2.9        |
|         | 37.5                                          | 38.31                         | 102.2 $\pm$ 0.15 | 0.4        | 37.36                              | 99.63 $\pm$ 0.55  | 1.5        |

\* $P<0.05$  vs Dt-MMIPs

Table S4 Extraction recovery of LTG and CBZ in rat serum treated by dispersive Dt-MMIPs SPE and acetonitrile protein precipitation (Mean $\pm$ SD, n=5)

| Analyte | Nominal concentration<br>( $\mu\text{g/mL}$ ) | Dt-MMIPs         |         | Acetonitrile protein precipitation |         |
|---------|-----------------------------------------------|------------------|---------|------------------------------------|---------|
|         |                                               | Recovery (%)     | RSD (%) | Recovery (%)                       | RSD (%) |
| LTG     | 25                                            | 78.99 $\pm$ 0.03 | 3.63    | 94.37 $\pm$ 0.03**                 | 2.94    |
|         | 37.5                                          | 76.55 $\pm$ 0.01 | 1.67    | 89.48 $\pm$ 0.03**                 | 3.24    |
| CBZ     | 25                                            | 87.31 $\pm$ 0.44 | 0.50    | 94.18 $\pm$ 0.01*                  | 1.24    |
|         | 37.5                                          | 85.11 $\pm$ 0.58 | 0.68    | 90.27 $\pm$ 0.01*                  | 1.28    |

\* $P<0.05$ , \*\* $P<0.01$  vs Dt-MMIPs

Table S5 The stability of LTG and CBZ in the supernatant of rat serum treated dispersive Dt-MMIPs SPE and acetonitrile protein precipitation at 4 °C or 25°C for 8 h (Mean±SD, n=5)

| Analyte | Nominal concentration (µg/mL) | Dt-MMIPs    |         |             |         | Acetonitrile protein precipitation |         |             |         |
|---------|-------------------------------|-------------|---------|-------------|---------|------------------------------------|---------|-------------|---------|
|         |                               | 4 °C        |         | 25°C        |         | 4 °C                               |         | 25°C        |         |
|         |                               | Residue (%) | RSD (%) | Residue (%) | RSD (%) | Residue (%)                        | RSD (%) | Residue (%) | RSD (%) |
| LTG     | 25                            | 96.00±0.15  | 0.2     | 96.93±0.40  | 0.4     | 100.1±0.03                         | 0.9     | 99.25±0.40  | 0.4     |
|         | 37.5                          | 104.3±0.06  | 0.1     | 101.9±0.01  | 1.0     | 101.8±0.01                         | 0.1     | 101.6±0.43  | 0.5     |
| CBZ     | 25                            | 101.4±0.44  | 0.5     | 101.9±0.01  | 1.0     | 99.82±0.02                         | 2.4     | 99.41±0.02  | 1.7     |
|         | 37.5                          | 106.3±0.59  | 0.6     | 105.4±0.46  | 0.5     | 101.8±0.01                         | 0.6     | 100.5±0.01  | 1.2     |

Table S6 The concentrations of CBZ or LTG in rat serum of 2 h after oral administration of 10 mg/kg CBZ or LTG

| Rat No. | CBZ (µg/mL) |                                    | LTG (µg/mL) |                                    |
|---------|-------------|------------------------------------|-------------|------------------------------------|
|         | Dt-MMIPs    | Acetonitrile protein precipitation | Dt-MMIPs    | Acetonitrile protein precipitation |
| 1       | 4.67        | 4.37                               | 2.95        | 2.67                               |
| 2       | 3.93        | 3.82                               | 4.35        | 4.13                               |
| 3       | 4.91        | 4.57                               | 2.51        | 2.24                               |
| 4       | 7.31        | 6.36                               | 2.11        | 1.82                               |
| 5       | 4.87        | 2.56                               | 3.38        | 3.17                               |
| 6       | 4.85        | 4.59                               | 3.73        | 3.42                               |
| Mean±SD | 5.09±1.15   | 4.38±1.23                          | 3.17±0.82   | 2.91±0.84                          |

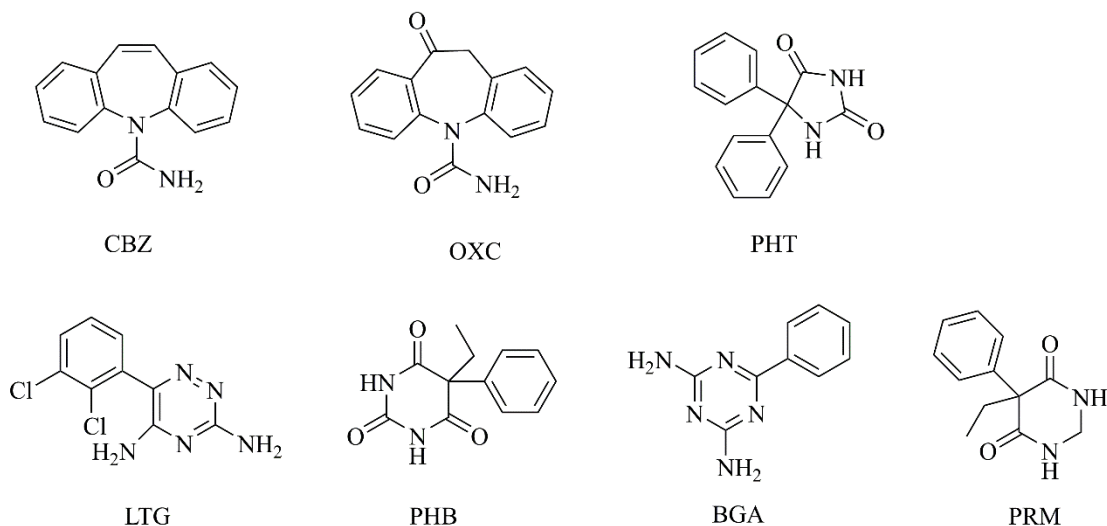

Fig. S1 The chemical structures of carbamazepine (CBZ), oxcarbazepine (OXC), phenytoin (PHT), lamotrigine (LTG), Phenobarbital (PHB), benzoguanamine (BGA) and primidone (PRM).

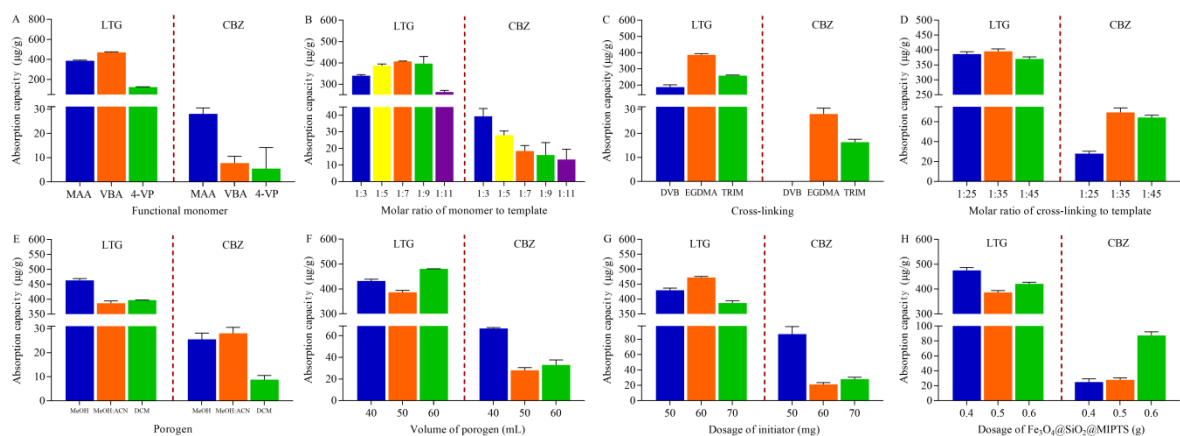

Fig. S2 Optimization of types and amounts of functional monomers, cross-linking, porogen, initiator and Fe<sub>3</sub>O<sub>4</sub>@SiO<sub>2</sub>@MPTS.

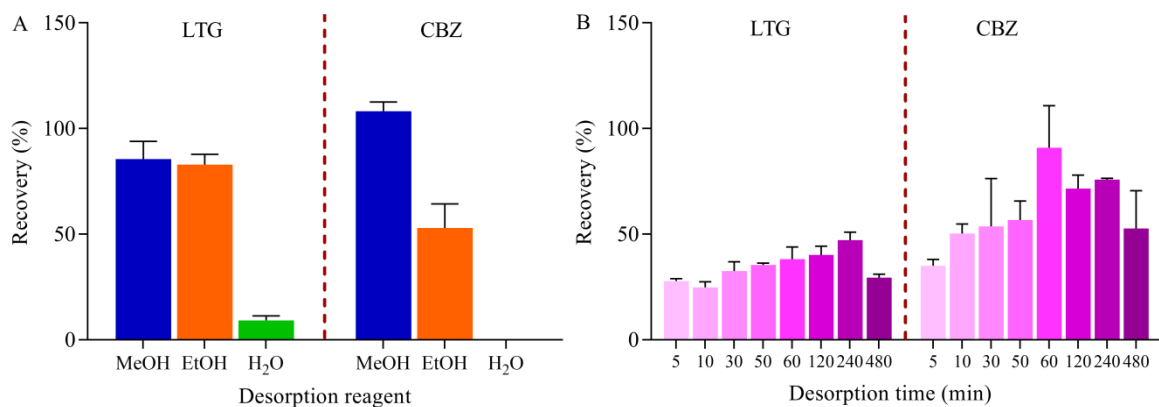

Fig. S3 Optimization of desorption reagent types (A) and desorption time (B).
